# Supplementary material for: Molecular docking study of potential phytochemicals and their effects on the complex of SARS-CoV2 spike protein and human ACE2
Source: PubMed Central journal article supplement (PMC7573581; doi:10.1038/s41598-020-74715-4), 2020-10-19
Supplement: 41598_2020_74715_MOESM1_ESM.pdf [file 41598_2020_74715_MOESM1_ESM.pdf]

## Molecular docking study of potential phytochemicals and their effects on the complex of SARS-CoV2 spike protein and human ACE2

Anamika Basu<sup>1</sup>, Anasua Sarkar<sup>2,\*</sup>, Ujjwal Maulik<sup>2</sup>

<sup>1</sup> Department of Biochemistry, Gurudas College, India, Email: [basuanamikaami@gmail.com](mailto:basuanamikaami@gmail.com)

<sup>2</sup> Computer Science and Engineering Department, Jadavpur University, India, Email: [anasua.sarkar@jadavpuruniversity.in](mailto:anasua.sarkar@jadavpuruniversity.in)

<sup>3</sup> Computer Science and Engineering Department, Jadavpur University, India, Email: [umaulik@cse.jdvu.ac.in](mailto:umaulik@cse.jdvu.ac.in)

### I. Detailed analysis of intermolecular contacts (ICs) and the list of amino acids which are present in the protein-protein interaction sites of spike protein fragment and ACE2 receptor in absence and presence of phytochemicals

Predicting binding affinity from structural models of protein-protein interaction, plays an important role in drug design. Comparative study for protein-protein binding interaction energy values as obtained in our research work, according to PRODIGY web server, is shown in the following table (Table S1.1):

Table S1.1 Comparative study for protein-protein binding interaction energy values

| Features                                                                                                   | Compounds                                                                                                                                        |                                                                                                                                                 |
|------------------------------------------------------------------------------------------------------------|--------------------------------------------------------------------------------------------------------------------------------------------------|-------------------------------------------------------------------------------------------------------------------------------------------------|
|                                                                                                            | Spike protein fragment bound with ACE2 receptor                                                                                                  | Spike protein fragment bound with ACE2 receptor in presence of hesperidin                                                                       |
| $\Delta G$ (binding energy) Kcal/mole                                                                      | 15.4                                                                                                                                             | 14.5                                                                                                                                            |
| $K_d$ (dissociation constant) at 25°C                                                                      | $5.1E^{-12}$                                                                                                                                     | $2.4E^{-11}$                                                                                                                                    |
| Intermolecular contacts (ICs) at the interface between the two protein within the threshold distance of 5Å | ICs charged-charged: 5<br>ICs charged-polar: 10<br>ICs charged-apolar: 19<br>ICs polar-polar: 9<br>ICs polar-apolar: 40<br>ICs apolar-apolar: 18 | ICs charged-charged: 3<br>ICs charged-polar: 7<br>ICs charged-apolar: 15<br>ICs polar-polar: 6<br>ICs polar-apolar: 36<br>ICs apolar-apolar: 12 |

The interface between spike protein fragment and ACE2 receptor in absence of natural product is shown in following Figure S1.1.

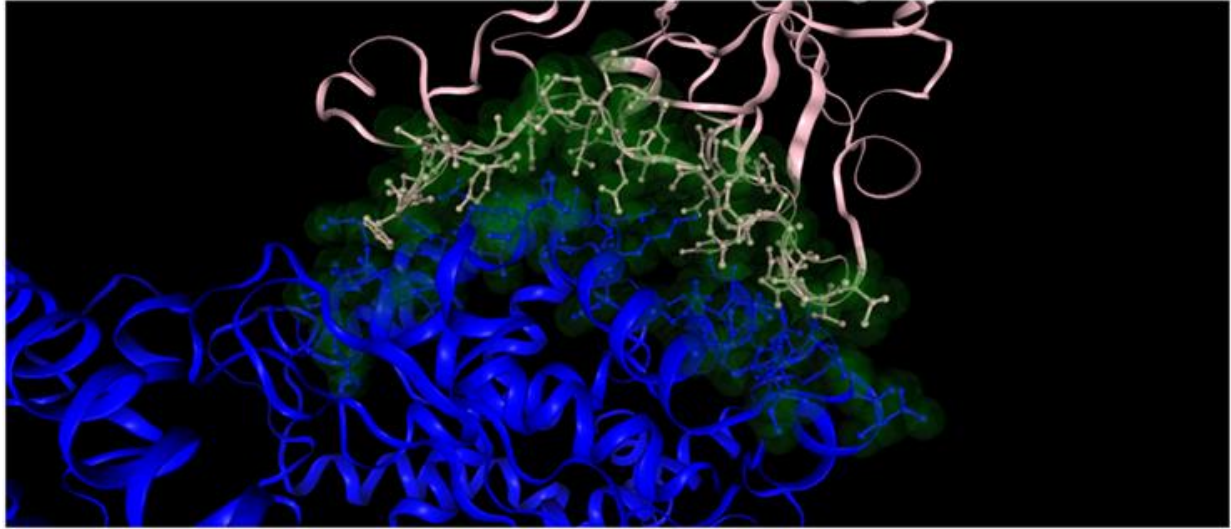

**Figure S1.1** The interface between spike protein fragment and ACE2 receptor in absence of natural product.

Interacting chains are colored in blue and pink (ACE2 and spike protein fragment respectively). Residues which are present at the interface, are highlighted with green spheres.

**Table S1.2** List of amino acids are present in the protein-protein interaction sites of spike protein fragment with ACE2 receptor.

|     |     |   |     |     |   |
|-----|-----|---|-----|-----|---|
| PRO | 426 | A | THR | 158 | B |
| SER | 317 | A | TYR | 111 | B |
| ARG | 306 | A | TYR | 107 | B |
| LYS | 313 | A | PHE | 155 | B |
| PRO | 321 | A | PHE | 144 | B |
| PRO | 426 | A | GLY | 160 | B |
| VAL | 316 | A | LEU | 150 | B |
| PRO | 321 | A | GLY | 143 | B |
| GLU | 310 | A | GLY | 104 | B |
| THR | 548 | A | LYS | 75  | B |
| GLN | 552 | A | ASN | 145 | B |
| SER | 425 | A | THR | 158 | B |
| VAL | 316 | A | GLN | 151 | B |
| ASN | 322 | A | GLU | 142 | B |
| TYR | 385 | A | PHE | 144 | B |
| ARG | 559 | A | ASN | 145 | B |
| SER | 420 | A | ASN | 159 | B |
| LEU | 320 | A | PHE | 114 | B |
| LYS | 313 | A | GLN | 151 | B |
| LYS | 419 | A | THR | 158 | B |
| ALA | 384 | A | PHE | 144 | B |
| GLN | 300 | A | GLN | 156 | B |
| LYS | 416 | A | TYR | 163 | B |
| GLY | 422 | A | GLN | 156 | B |
| ILE | 421 | A | GLN | 156 | B |
| LYS | 313 | A | TYR | 153 | B |
| LYS | 313 | A | TYR | 107 | B |

|     |     |   |     |     |   |
|-----|-----|---|-----|-----|---|
| ASN | 546 | A | LEU | 113 | B |
| LEU | 558 | A | PHE | 144 | B |
| MET | 383 | A | PHE | 144 | B |
| ARG | 559 | A | PHE | 144 | B |
| ASP | 299 | A | VAL | 103 | B |
| ASN | 322 | A | PHE | 148 | B |
| VAL | 316 | A | PHE | 114 | B |
| PHE | 555 | A | PHE | 144 | B |
| LYS | 419 | A | GLY | 160 | B |
| GLN | 552 | A | ALA | 133 | B |
| SER | 317 | A | GLN | 151 | B |
| ASN | 546 | A | LYS | 75  | B |
| PHE | 555 | A | ASN | 145 | B |
| PRO | 321 | A | CYS | 146 | B |
| LEU | 424 | A | THR | 158 | B |
| LEU | 423 | A | THR | 158 | B |
| THR | 548 | A | LEU | 113 | B |
| GLY | 422 | A | THR | 158 | B |
| VAL | 318 | A | LEU | 113 | B |
| TRP | 302 | A | GLN | 156 | B |
| PRO | 321 | A | GLU | 142 | B |
| ARG | 306 | A | GLY | 104 | B |
| LYS | 419 | A | ASN | 159 | B |
| LEU | 423 | A | GLN | 156 | B |
| GLY | 422 | A | ASN | 159 | B |
| PHE | 555 | A | TYR | 147 | B |
| GLN | 300 | A | THR | 158 | B |
| ILE | 421 | A | ASN | 159 | B |
| GLU | 310 | A | TYR | 107 | B |
| GLY | 319 | A | PHE | 114 | B |
| PHE | 314 | A | GLN | 151 | B |
| LYS | 313 | A | SER | 152 | B |
| ASN | 546 | A | TYR | 163 | B |
| THR | 548 | A | PHE | 114 | B |
| LEU | 560 | A | PHE | 144 | B |
| ASN | 546 | A | TYR | 111 | B |
| ARG | 306 | A | GLY | 105 | B |
| TRP | 302 | A | GLY | 104 | B |
| PRO | 426 | A | ASN | 159 | B |
| VAL | 316 | A | LEU | 113 | B |
| SER | 420 | A | GLY | 160 | B |
| SER | 317 | A | LEU | 113 | B |
| GLY | 319 | A | TYR | 147 | B |
| LYS | 313 | A | GLY | 154 | B |
| SER | 420 | A | GLY | 154 | B |
| PRO | 321 | A | TYR | 147 | B |
| GLU | 310 | A | GLN | 156 | B |
| ARG | 306 | A | GLN | 156 | B |
| LEU | 424 | A | ASN | 159 | B |
| VAL | 318 | A | PHE | 114 | B |
| GLY | 319 | A | LEU | 113 | B |
| MET | 383 | A | GLY | 143 | B |
| VAL | 316 | A | PHE | 148 | B |
| GLN | 300 | A | GLY | 104 | B |
| GLN | 300 | A | VAL | 103 | B |
| ASN | 546 | A | ARG | 61  | B |
| ILE | 421 | A | GLY | 154 | B |

|     |     |   |     |     |   |
|-----|-----|---|-----|-----|---|
| SER | 420 | A | TYR | 163 | B |
| LEU | 320 | A | TYR | 147 | B |

The interface between spike protein fragment and ACE2 receptor in presence of hesperidin is shown in following Figure S1.2.

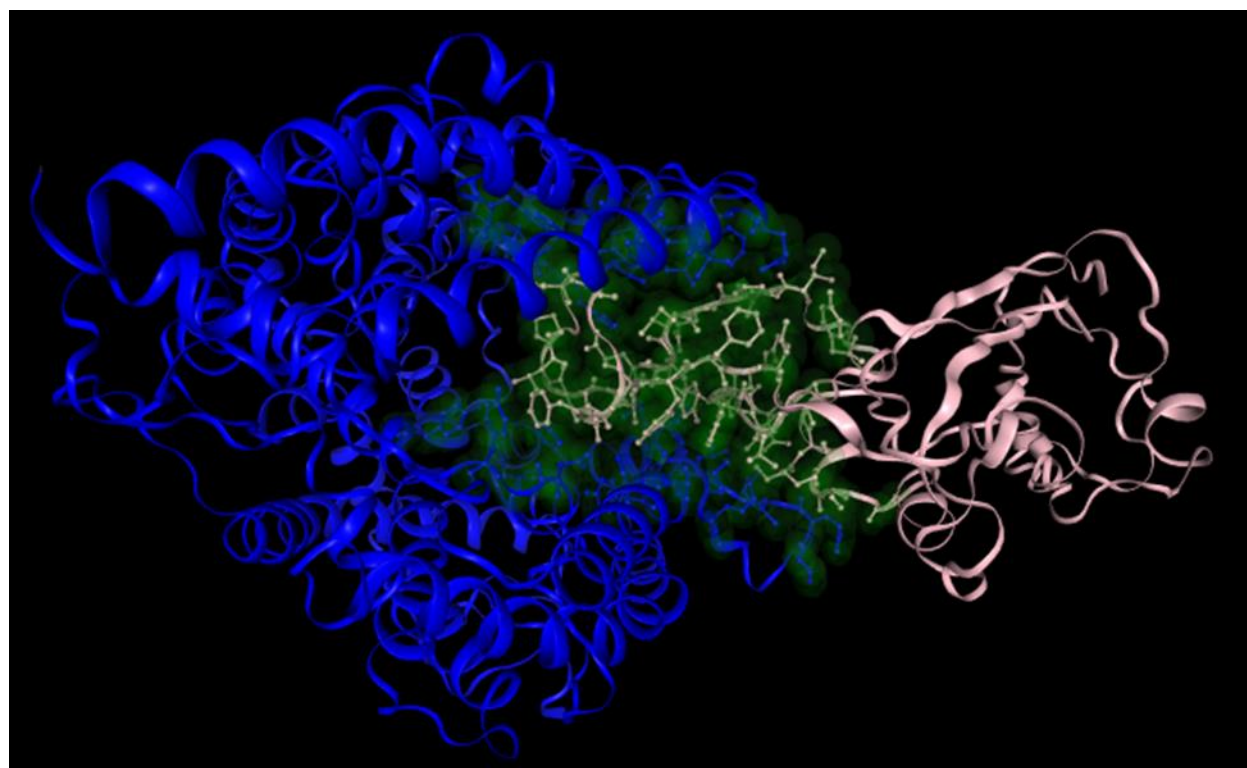

**Figure S1.2** The interface between spike protein fragment and ACE2 receptor in presence of hesperidin.

Interacting chains are colored in blue and pink (ACE2 and spike protein fragment respectively). Residues which are present at the interface, are highlighted with green spheres.

**Table S1.3** List of amino acids which are present in the protein-protein interaction sites of spike protein fragment with ACE2 receptor in presence of hesperidin.

|     |     |   |     |     |   |
|-----|-----|---|-----|-----|---|
| VAL | 59  | A | ILE | 130 | B |
| SER | 128 | A | TYR | 131 | B |
| LEU | 143 | A | TYR | 79  | B |
| PRO | 138 | A | THR | 73  | B |
| LEU | 143 | A | ARG | 115 | B |
| VAL | 343 | A | ILE | 130 | B |
| LEU | 143 | A | LYS | 116 | B |
| LEU | 143 | A | TYR | 131 | B |
| TRP | 349 | A | ASN | 139 | B |

|     |     |   |     |     |   |
|-----|-----|---|-----|-----|---|
| TYR | 127 | A | ASN | 145 | B |
| PRO | 146 | A | LYS | 116 | B |
| TYR | 510 | A | PHE | 144 | B |
| ASN | 51  | A | ASN | 139 | B |
| GLU | 56  | A | LEU | 150 | B |
| LYS | 341 | A | THR | 128 | B |
| SER | 124 | A | ASN | 145 | B |
| SER | 47  | A | GLY | 140 | B |
| ASN | 508 | A | TYR | 147 | B |
| LYS | 131 | A | ASN | 118 | B |
| THR | 129 | A | TYR | 79  | B |
| TYR | 50  | A | THR | 128 | B |
| MET | 62  | A | GLY | 140 | B |
| PRO | 146 | A | SER | 117 | B |
| SER | 124 | A | PHE | 144 | B |
| GLU | 145 | A | LYS | 116 | B |
| TRP | 349 | A | GLY | 140 | B |
| ASN | 508 | A | GLY | 143 | B |
| MET | 62  | A | ILE | 130 | B |
| SER | 128 | A | TYR | 147 | B |
| THR | 129 | A | LYS | 75  | B |
| HIS | 505 | A | THR | 136 | B |
| GLU | 56  | A | PHE | 148 | B |
| SER | 128 | A | ALA | 133 | B |
| TYR | 50  | A | GLU | 129 | B |
| ILE | 54  | A | GLU | 129 | B |
| ILE | 54  | A | THR | 128 | B |
| THR | 125 | A | TYR | 147 | B |
| THR | 347 | A | ASN | 139 | B |
| GLU | 145 | A | GLY | 134 | B |
| LYS | 341 | A | GLU | 129 | B |
| SER | 124 | A | TYR | 147 | B |
| GLN | 139 | A | THR | 73  | B |
| GLU | 145 | A | ALA | 133 | B |
| CYS | 141 | A | ASN | 118 | B |
| THR | 129 | A | LEU | 113 | B |
| THR | 129 | A | TYR | 131 | B |
| LYS | 131 | A | ASP | 78  | B |
| THR | 125 | A | PHE | 114 | B |
| ASN | 508 | A | PHE | 144 | B |
| THR | 347 | A | PRO | 137 | B |
| VAL | 59  | A | THR | 128 | B |
| PHE | 504 | A | THR | 136 | B |
| SER | 124 | A | GLY | 143 | B |
| LYS | 341 | A | SER | 127 | B |
| ALA | 348 | A | ASN | 139 | B |
| THR | 129 | A | PHE | 114 | B |
| GLU | 56  | A | THR | 128 | B |
| LYS | 341 | A | ILE | 126 | B |
| SER | 128 | A | PHE | 114 | B |
| PHE | 504 | A | SER | 135 | B |
| HIS | 345 | A | PRO | 137 | B |
| VAL | 343 | A | GLU | 129 | B |
| GLN | 139 | A | GLY | 71  | B |
| PHE | 504 | A | ASN | 145 | B |
| GLU | 56  | A | TYR | 9   | B |
| GLU | 56  | A | ILE | 126 | B |

|     |     |   |     |     |   |
|-----|-----|---|-----|-----|---|
| SER | 47  | A | ASN | 139 | B |
| LYS | 131 | A | TYR | 79  | B |
| PRO | 346 | A | PRO | 137 | B |
| ASN | 508 | A | ASN | 145 | B |
| ASN | 51  | A | GLY | 140 | B |
| LEU | 143 | A | ASN | 118 | B |
| TYR | 515 | A | THR | 136 | B |
| HIS | 345 | A | GLN | 132 | B |
| CYS | 141 | A | THR | 73  | B |
| VAL | 59  | A | PHE | 148 | B |
| PHE | 504 | A | PHE | 144 | B |
| TYR | 50  | A | ILE | 130 | B |
| SER | 124 | A | CYS | 146 | B |
